# Supplementary material for: Hypomyelinating disorders in China: The clinical and genetic heterogeneity in 119 patients
Source: PLoS One. 2018 Feb 16;13(2):e0188869. doi: 10.1371/journal.pone.0188869 (PMC5815574; doi:10.1371/journal.pone.0188869)
Supplement: S8 Table — (XLSX) [file pone.0188869.s008.xlsx]

## Sheet: S8 Table
18q21.3→18qter
617201	NEDD4L	Periventricular nodular heterotopia 7
615468	MALT1	Immunodeficiency 12
611038	RAX	Microphthalmia, isolated 3
227300	LMAN1	Combined factor V and VIII deficiency
235510	CCBE1	Hennekam lymphangiectasia-lymphedema syndrome 1
601665	MC4R	Obesity, autosomal dominant
614080	PIGN	Multiple congenital anomalies-hypotonia-seizures syndrome 1
174810	TNFRSF11A	Osteolysis, familial expansile
	BCL2	Leukemia/lymphoma, B-cell, 2
615598	SERPINB7	Palmoplantar keratoderma, Nagashima type
617115	SERPINB8	Peeling skin syndrome 5
614833	RTTN	Microcephaly, short stature, and polymicrogyria with seizures
250790	CYB5A	Methemoglobinemia, type IV
607842	TSHZ1	Aural atresia, congenital
604168	CTDP1	Congenital cataracts, facial dysmorphism, and neuropathy
608572	TXNL4A	Burn-McKeown syndrome
18p11.3→18pter
609628	LPIN2	CHRONIC RECURRENT MULTIFOCAL OSTEOMYELITIS, CONGENITAL
603457	SMCHD1	Bosma arhinia microphthalmia syndrome
18p11.3→18q21.3
142946	TGIF1	Holoprosencephaly 4
615960	LAMA1	Poretti-Boltshauser syndrome
252010	NDUFV2	Mitochondrial complex I deficiency
605389	APCDD1	Hypotrichosis 1
114300	PIEZO2	Arthrogryposis, distal
615073	GNAL	Dystonia 25
614487	AFG3L2	Spastic ataxia 5, autosomal recessive
202200	MC2R	Glucocorticoid deficiency, due to ACTH unresponsiveness
615092	MIB1	Left ventricular noncompaction 7
614475	GATA6	Atrial septal defect 9
251255	RBBP8	Jawad syndrome
257220	NPC1	Niemann-Pick disease
226650	LAMA3	Epidermolysis bullosa, generalized atrophic benign
615841	TAF4B	Spermatogenic failure 13
181270	KCTD1	Scalp-ear-nipple syndrome
613102	DSC3	Hypotrichosis and recurrent skin vesicles
610476	DSC2	Arrhythmogenic right ventricular dysplasia 11
615508	DSG1	Erythroderma, congenital, with palmoplantar keratoderma, hypotrichosis, and hyper IgE
607903	DSG4	Hypotrichosis 6
610193	DSG2	Arrhythmogenic right ventricular dysplasia 10
105210	TTR	Amyloidosis, hereditary, transthyretin-related
616260	RNF125	Tenorio syndrome
615485	ASXL3	Bainbridge-Ropers syndrome
604169	DTNA	Left ventricular noncompaction 1, with or without congenital heart defects
616734	MAPRE2	Symmetric circumferential skin creases, congenital, 2
617270	ELP2	Mental retardation, autosomal recessive 58
603592	MOCOS	Xanthinuria, type II
616078	SETBP1	Mental retardation, autosomal dominant 29
111000	SLC14A1	Kidd blood group
242840	EPG5	Vici syndrome
616045	ATP5A1	Combined oxidative phosphorylation deficiency 22
613079	LOXHD1	Deafness, autosomal recessive 77
614231	IER3IP1	Microcephaly, epilepsy, and diabetes syndrome
612229	SMAD7	Colorectal cancer, susceptibility to, 3
223800	DYM	Dyggve-Melchior-Clausen disease
251850	MYO5B	Microvillus inclusion disease
614779	CCDC11	Heterotaxy, visceral, 6, autosomal recessive
175050	SMAD4	Juvenile polyposis/hereditary hemorrhagic telangiectasia syndrome
114500	DCC	Colorectal cancer, somatic
613267	TCF4	Corneal dystrophy, Fuchs endothelial, 3
177000	FECH	Protoporphyria, erythropoietic, autosomal recessive
243300	ATP8B1	Cholestasis, benign recurrent intrahepatic
